# Supplementary material for: Simple method for detecting idiopathic interstitial pneumonias by measuring vertical lung length on chest X-ray
Source: PubMed Central journal article supplement (PMC8027863; doi:10.1038/s41598-021-87452-z), 2021-04-07
Supplement: 41598_2021_87452_MOESM1_ESM.pdf [file 41598_2021_87452_MOESM1_ESM.pdf]

**Simple method for detecting idiopathic interstitial pneumonias by measuring vertical lung length on chest X-ray**

**Authors:** Masato Karayama<sup>1\*</sup>, Yoichiro Aoshima<sup>1</sup>, Hideki Yasui<sup>1</sup>, Hironao Hozumi<sup>1</sup>, Yuzo Suzuki<sup>1</sup>, Kazuki Furuhashi<sup>1</sup>, Tomoyuki Fujisawa<sup>1</sup>, Noriyuki Enomoto<sup>1</sup>, Yutaro Nakamura<sup>1</sup>, Naoki Inui<sup>1,2</sup>, Takafumi Suda<sup>1</sup>

**Affiliations:**

<sup>1</sup>Second Division, Department of Internal Medicine, Hamamatsu University School of Medicine, 1-20-1 Handayama, Hamamatsu 431-3192, Japan

<sup>2</sup>Department of Clinical Pharmacology and Therapeutics, Hamamatsu University School of Medicine, 1-20-1 Handayama, Hamamatsu 431-3192, Japan

**Supplementary Table 1. Results of vertical lung length**

|                             | Exploratory cohort |                          | Validation cohort |                          | Total cohort     |                   |
|-----------------------------|--------------------|--------------------------|-------------------|--------------------------|------------------|-------------------|
|                             | Controls, n=140    | IIPs, n=140              | Control, n=140    | IIPs, n=140              | Controls, n=280  | IIPs, n=280       |
| Unadjusted <i>u</i> VLL, mm | 100 (69-131)       | 95 (68-130) <sup>#</sup> | 98 (67-123)       | 94 (66-130) <sup>#</sup> | 99 (67-131)      | 95 (66-130)*      |
| <i>u</i> VLL, mm/m          | 61 (48-75)         | 59 (47-79) <sup>#</sup>  | 60 (46-77)        | 59 (43-75) <sup>#</sup>  | 61 (46-77)       | 59 (43-79)*       |
| Unadjusted <i>l</i> VLL, mm | 183 (134-233)      | 147 (74-227)*            | 184 (133-228)     | 143 (57-201)*            | 184 (133-233)    | 145 (57-227)*     |
| <i>l</i> VLL, mm/m          | 112 (87-138)       | 91 (48-130)*             | 114 (81-138)      | 91 (37-125)*             | 113 (81-138)     | 91 (37-130)*      |
| Unadjusted <i>t</i> VLL, mm | 282 (215-358)      | 241 (151-327)*           | 282 (202-336)     | 238 (135-315)*           | 282 (202-358)    | 240 (135-327)*    |
| <i>t</i> VLL, mm/m          | 164 (143-206)      | 137 (103-189)*           | 174 (136-207)     | 149 (87-193)*            | 174 (136-207)    | 150 (87-193)*     |
| <i>l/u</i> VLL ratio        | 1.86 (1.41-2.64)   | 1.59 (0.76-2.27)*        | 1.85 (1.30-2.73)  | 1.49 (0.73-2.71)*        | 1.85 (1.30-2.73) | 1.55 (0.73-2.71)* |

Data presented as median (range).

IIPs, idiopathic interstitial pneumonias; *t*VLL, total vertical length of the lung; *u*VLL, upper vertical length of the lungs; *l*VLL, lower vertical length of the lung.

\* $p < 0.001$  compared with control subjects in each cohort.

<sup>#</sup> $p < 0.005$  compared with control subjects in each cohort.

**Supplementary Table 2. Logistic regression analyses for idiopathic pulmonary fibrosis and non-idiopathic pulmonary fibrosis**

| Variables                        | Odds ratio        | <i>p</i> -value | Odds ratio        | <i>p</i> -value | Odds ratio        | <i>p</i> -value | Odds ratio        | <i>p</i> -value |
|----------------------------------|-------------------|-----------------|-------------------|-----------------|-------------------|-----------------|-------------------|-----------------|
| Age                              | 1.03 (0.99-1.08)  | 0.088           | 1.04 (1.00-1.08)  | 0.074           | 1.03 (1.00-1.08)  | 0.085           | 1.03 (0.99-1.07)  | 0.089           |
| Sex, male                        | 6.62 (3.36-13.06) | <.001           | 6.35 (3.20-12.60) | <.001           | 6.36 (3.23-12.50) | <.001           | 6.06 (3.08-11.93) | <.001           |
| BMI                              | 0.96 (0.85-1.09)  | 0.566           | 1.01 (0.91-1.13)  | 0.807           | 0.97 (0.86-1.09)  | 0.598           | 0.97 (0.94-1.01)  | 0.886           |
| FVC <sub>%pred</sub>             | 0.98 (0.95-1.02)  | 0.371           | 0.97 (0.94-1.01)  | 0.094           | 0.98 (0.95-1.02)  | 0.264           | 1.02 (0.98-1.05)  | 0.110           |
| FEV <sub>1%pred</sub>            | 1.01 (0.98-1.05)  | 0.497           | 1.01 (0.98-1.05)  | 0.410           | 1.01 (0.98-1.05)  | 0.438           | 1.01 (0.98-1.04)  | 0.381           |
| %LAA                             | 1.01 (0.98-1.04)  | 0.402           | 1.01 (0.98-1.04)  | 0.539           | 1.01 (0.98-1.04)  | 0.441           | 0.50 (0.18-1.41)  | 0.528           |
| <i>t</i> VLL                     | 0.98 (0.96-1.01)  | 0.161           |                   |                 |                   |                 |                   |                 |
| <i>u</i> VLL                     |                   |                 | 1.00 (0.95-1.05)  | 0.899           |                   |                 |                   |                 |
| <i>l</i> VLL                     |                   |                 |                   |                 | 0.98 (0.96-1.01)  | 0.137           |                   |                 |
| <i>l</i> VLL/ <i>u</i> VLL ratio |                   |                 |                   |                 |                   |                 | 0.97 (0.94-1.01)  | 0.193           |

Data are expressed as odds ratio (95% confident interval) for idiopathic pulmonary fibrosis. In continuous variables, odds ratio is expressed as per 1 value increase. BMI, body mass index; FEV<sub>1%pred</sub>, percentage predicted forced expiratory volume in one second; FVC<sub>%pred</sub>, percentage predicted forced vital capacity; *t*VLL, total vertical length of the lung; *u*VLL, upper vertical length of the lungs; *l*VLL, lower vertical length of the lung; %LAA, percentage low-attenuation area.

**Supplementary Table 3. Characteristics of patients with secondary IPs**

|                             | Secondary IPs, n=240 | IIPs, n=280         | Controls, n=280     |
|-----------------------------|----------------------|---------------------|---------------------|
| Age                         | 64 (24-87)           | 70 (36-92)*         | 71.0 (24-93)*       |
| Sex, male                   | 113 (47.1)           | 214 (76.4)*         | 214 (76.4)*         |
| Body-mass index             | 22.3 (14.5-32.6)     | 23.0 (15.6-35.6)**  | 22.9 (14.7-48.1)**  |
| <b>Spirometry</b>           |                      |                     |                     |
| %predicted FVC              | 82.4 (32.6-136.3)    | 79.3 (28.0-132.8)*  | 100.0 (79.9-137.1)* |
| %predicted FEV <sub>1</sub> | 80.4 (31.2-141.0)    | 81.4 (34.8-141.1)*  | 97.1 (77.9-141.4)*  |
| FEV <sub>1</sub> /FVC ratio | 81.7 (42.1-105.1)    | 83.2 (47.9-100.0)** | 79.0 (70.1-116.3)** |

Data presented as median (range) or number (%).

FEV<sub>1</sub>, forced expiratory volume in 1 s; FVC, forced vital capacity; IIPs, idiopathic interstitial pneumonias; IPs, interstitial pneumonias.

\* $p < 0.001$  compared with secondary IPs

\*\* $p < 0.050$  compared with secondary IPs

Supplementary Table

**Supplementary Table 4. Comparison of vertical lung length between IIPs and secondary IPs**

|                      | All patients         |                   | %predicted FVC $\geq$ 80% |                   |
|----------------------|----------------------|-------------------|---------------------------|-------------------|
|                      | Secondary IPs, n=240 | IIPs, n=280       | Secondary IPs, n=137      | IIPs, n=137       |
| <i>u</i> VLL, mm/m   | 58 (37-80)           | 59 (43-79)**      | 59 (40-80)                | 62 (44-79)**      |
| <i>l</i> VLL, mm/m   | 104 (51-158)         | 91 (37-130)*      | 107 (66-141)              | 98 (59-130)*      |
| <i>t</i> VLL, mm/m   | 163 (100-220)        | 150 (87-193)*     | 168 (125-220)             | 161 (113-193)**   |
| <i>l/u</i> VLL ratio | 1.79 (0.98-3.64)     | 1.55 (0.73-2.71)* | 1.82 (1.04-2.74)          | 1.60 (0.95-2.52)* |

Data presented as median (range).

IIPs, idiopathic interstitial pneumonias; IPs, interstitial pneumonias; *t*VLL, total vertical length of the lung; *u*VLL, upper vertical length of the lungs; *l*VLL, lower vertical length of the lung.

\* $p < 0.001$  compared with secondary IPs

\*\* $p < 0.050$  compared with secondary IPs
